# Supplementary material for: Amphiphilic ionic liquid stabilizing palladium nanoparticles for highly efficient catalytic hydrogenation
Source: Royal Society of Chemistry journal article supplement (doi:10.1039/c1cp20255c), 2011-01-01
Supplement: c1cp20255c.pdf [file c1cp20255c.pdf]

## SUPPORTING INFORMATION

### An Amphiphilic Ionic Liquid Stabilizing Palladium Nanoparticles for Highly Efficient Catalytic Hydrogenation

Wenwen Zhu,<sup>†</sup> Hanming Yang,<sup>‡</sup> Yinyin Yu,<sup>†</sup> Li Hua,<sup>†</sup> Huan Li<sup>†</sup>, Bo Feng,<sup>†</sup> and  
Zhenshan Hou<sup>\*†</sup>

<sup>†</sup>Key Laboratory for Advanced Materials, Research Institute of Industrial Catalysis, East China University of Science and Technology, Shanghai, 200237, China

<sup>‡</sup>Key Laboratory of Catalysis and Materials Science of the State Ethnic Affairs Commission and Ministry of Education, Hubei Province, South-Central University for Nationalities, Wuhan, 430074, China.

Corresponding author: houzhenshan@ecust.edu.cn

#### 1. Synthesis of ILs

##### Preparation of 1-Dodecyl-2-Methylimidazole

A solution of 2-methylimidazole (1.314 g, 17 mmol) in 10 mL of anhydrous THF was added to a stirred suspension of NaH (0.504 g, 21 mmol) in 8 mL of THF at room temperature. The mixture was stirred for 1 h and then a mixed solution of 1-bromododecane (4.0 g, 16 mmol) and tetrabutylammonium bromide (0.258 g, 0.8 mmol) in 10 mL THF was added. After 6 h at 40 °C, the precipitate was filtered and washed with CH<sub>2</sub>Cl<sub>2</sub> (2×15 mL), and then evaporating the solvent gave 1-dodecyl-2-methylimidazole (3.8 g, Yield: 95%).  $\delta_{\text{H}}$ (500 MHz; CDCl<sub>3</sub>; Me<sub>4</sub>Si) 6.89 (1H, s, CH), 6.80 (1H, s, CH), 3.80 (2H, t, CH<sub>2</sub>), 2.36 (3H, s, CH<sub>3</sub>), 1.71 (2H, m, CH<sub>2</sub>), 1.30-1.26 (18H, m, CH<sub>2</sub>), 0.88 ppm (3H, t, CH<sub>3</sub>).

##### Preparation of the Poly(ethylene glycol) Functionalized Dicationic Ionic Liquid (C<sub>12</sub>Im-PEG IL)

The PEG-2000 chloride was synthesized according to our previously reported

procedure.<sup>1</sup> A mixture of chlorinated PEG-2000 (3.5 g, 1.7 mmol) and 1-dodecyl-2-methylimidazole (0.88 g, 3.5 mmol) was stirred at 90 °C for 72 h under 1.0 MPa nitrogen at autoclave. After the quaterization reaction of 1-dodecyl-2-methylimidazole with chlorinated PEG, then the product was washed with diethyl ether (3×2 mL) and then the solvent was evaporated at 70 °C for 2 h under vacuum to afford slightly yellow and highly viscous liquid (Scheme 1S, Yield: 99%).  $\delta_{\text{H}}$ (500 MHz,  $\text{CDCl}_3$ ;  $\text{Me}_4\text{Si}$ ) 8.05 (2H, s, CH), 7.37 (2H, s, CH), 4.62 (4H, t,  $\text{CH}_2$ ), 4.15 (4H, t,  $\text{CH}_2$ ), 3.92 (4H, t,  $\text{CH}_2$ ), 3.46-3.81 (m, PEG), 1.78 (4H, m,  $\text{CH}_2$ ), 1.33-1.25 (36H, m,  $\text{CH}_2$ ), 0.88 ppm (6H, t,  $\text{CH}_3$ ). Found: C, 56.16; H, 9.06, N; 1.87. Calc. for  $\text{C}_{122}\text{H}_{240}\text{O}_{44}\text{N}_4\text{Cl}_2$ : C, 57.75; H, 9.47; N, 2.21%.

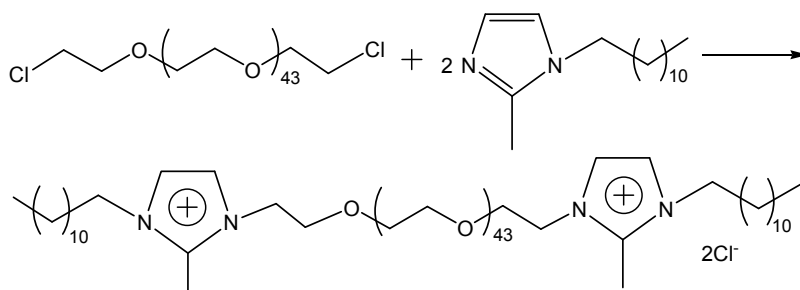

**Scheme 1S** Synthesis of the poly(ethylene glycol) functionalized dicationic  $\text{C}_{12}\text{Im-PEG IL}$ .

## 2. Preparation of $\text{C}_{12}\text{-PEG-C}_{12}$ Surfactants

A solution of PEG-2000 (3.4 g, 1.7 mmol) in 10 mL of anhydrous THF was added to a stirred suspension of NaH (0.096 g, 4.0 mmol) in 8 mL of THF at 40 °C. The mixture was stirred for 2 h and then a solution of 1-bromohexane (1.0 g, 4.0 mmol) in 10 mL THF was added. After 18 h at 40 °C, the precipitate was filtered and washed with  $\text{CH}_2\text{Cl}_2$  (2×15 mL); and then evaporation of the solvent gave  $\text{C}_{12}\text{-PEG-C}_{12}$  surfactant (Scheme 2S, Yield: 83%).  $\delta_{\text{H}}$ (500 MHz;  $\text{CDCl}_3$ ;  $\text{Me}_4\text{Si}$ ) 3.44-3.58 (m, PEG), 1.57 (4H, m,  $\text{CH}_2$ ), 1.24-1.28 (36H, m,  $\text{CH}_2$ ), 0.88 ppm (6H, t,  $\text{CH}_3$ ). Found: C, 57.73; H, 9.84. Calc. for  $\text{C}_{114}\text{H}_{230}\text{O}_{46}$ : C, 58.61; H, 9.85%.

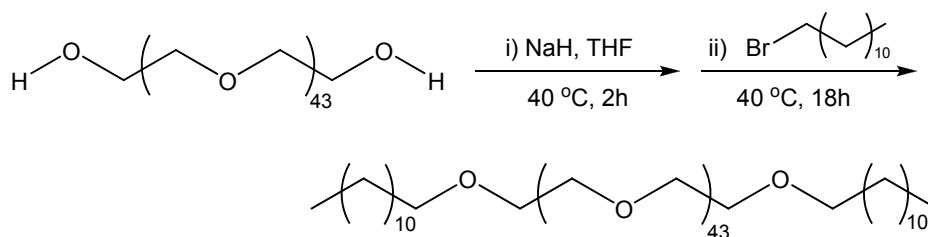

**Scheme 2S** Synthesis of  $\text{C}_{12}$ -PEG- $\text{C}_{12}$  Gemini surfactants.

### 3. Conductivity Measurements of the Poly(ethylene glycol) Functionalized Dicationic Ionic Liquid ( $\text{C}_{12}\text{Im}$ -PEG IL)

Generally, the critical micelle concentration (CMC) of surfactants can also be measured by conductivity measurements.<sup>2,3</sup> In this paper, the conductivity of different solutions as a function of concentration was also measured using an electrical conductivity meter (DDS-307) at room temperature. As shown in Fig. 1S, the CMC of  $\text{C}_{12}\text{Im}$ -PEG IL (about  $3.8 \times 10^{-3} \text{ mol L}^{-1}$ ) determined from conductivity measurements is close to the value from surface tension measurements (Fig. 5).

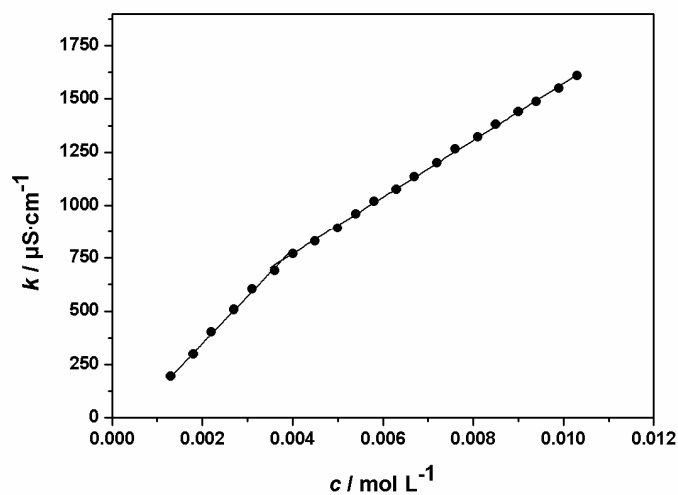

**Fig. 1S** The plots of specific conductivity vs the concentration of  $\text{C}_{12}\text{Im}$ -PEG IL at  $25\text{ }^\circ\text{C}$ .

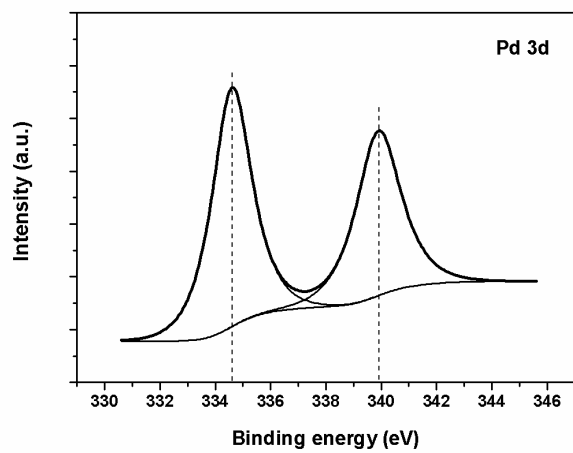

**Fig. 2S** X-ray photoelectron spectra of the isolated palladium NPs.

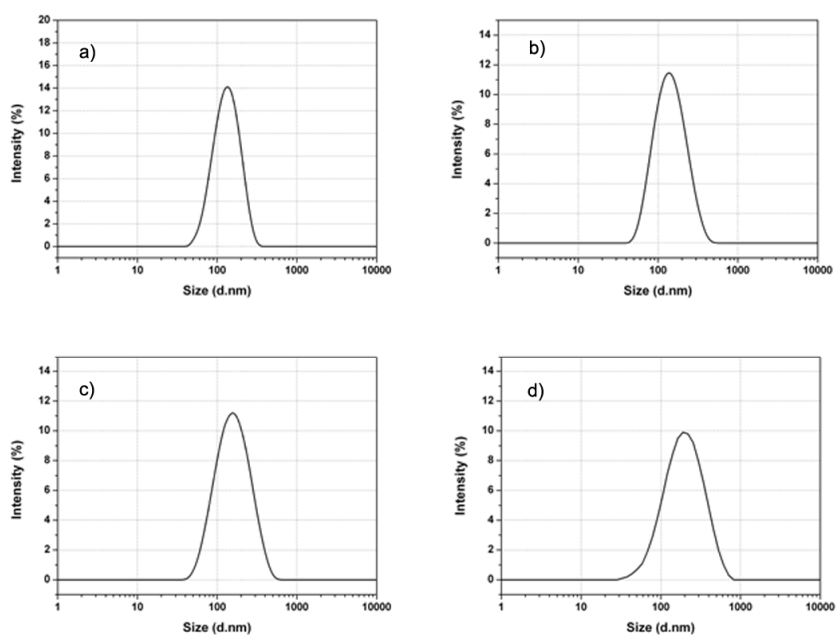

**Fig. 3S** Hydrodynamic diameter of  $C_{12}Im$ -PEG IL micelles formed in the aqueous solution at the concentration of a)  $4.73 \times 10^{-3} \text{ molL}^{-1}$ ; b)  $7.0 \times 10^{-3} \text{ molL}^{-1}$ ; c)  $1.03 \times 10^{-2} \text{ molL}^{-1}$ ; d)  $1.31 \times 10^{-2} \text{ molL}^{-1}$ , respectively. The distribution of hydrodynamic diameter was calculated from the CONTIN algorithm.

**Table 1S** Hydrogenation of various substrates catalyzed by the aqueous colloidal suspension of palladium NPs<sup>a</sup>

| Entries | Substrates                                                                          | Sub/Pd | Products                                                                             | <i>t</i> [h] | Yield [%] | TOF [h <sup>-1</sup> ] |
|---------|-------------------------------------------------------------------------------------|--------|--------------------------------------------------------------------------------------|--------------|-----------|------------------------|
| 1       | 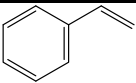   | 10,000 |     | 1.5          | 100       | 12300                  |
| 2       |    | 10,000 |     | 4            | 100       | 5200                   |
| 3       |    | 10,000 |     | 3            | 100       | 6800                   |
| 4       |    | 10,000 |     | 4            | 95        | 4750                   |
| 5       |    | 10,000 |    | 1            | 100       | 17200                  |
| 6       |    | 2,000  |     | 3            | 100       | 1430                   |
| 7       |   | 5,000  |   | 4            | 100       | 2850                   |
| 8       |  | 1,000  |   | 5            | <1        | nd <sup>b</sup>        |
| 9       |  | 5,000  |  | 10           | 93.3      | 1200                   |
| 10      |  | 1,000  |   | 2            | >99       | 1280                   |
| 11      |  | 1,200  |   | 3            | 100       | 1050                   |
| 12      |  | 1,000  |  | 3.5          | 90.6      | 640                    |

<sup>a</sup>Reaction conditions: 1.5 mL of aqueous colloidal suspension containing  $2.25 \times 10^{-6}$  mol Pd catalyst; room temperature (25 °C); hydrogen pressure (1.0 MPa); <sup>b</sup>Not determined.

## Reference

- 1 H. Li, Y. Qiao, L. Hua and Z. Hou, *ChemCatChem*, 2010, **2**, 1165–1170.
- 2 K. Din, M. S. Sheikh and A. A. Dar, *J. Phys. Chem. B*, 2010, **114**, 6023–6032.
- 3 P. Carpena, J. Aguiar, P. Bernaola-Galván and C. C. Ruiz, *Langmuir*, 2002, **18**, 6054–6058.
